# Supplementary material for: Lewis acid catalysed polymerisation of cyclopentenone
Source: Royal Society of Chemistry journal article supplement (doi:10.1039/d3sc05186b), 2023-12-01
Supplement: d3sc05186b1.pdf [file d3sc05186b1.pdf]

# Supporting Information for

## **Lewis acid catalysed polymerisation of cyclopentenone.**

Deepamali Dissanayake,<sup>1</sup> Alysia Draper,<sup>1</sup> Zhizhou Liu,<sup>1,2</sup> Neelofur Jaunnoo,<sup>1</sup> Joris J. Haven,<sup>1</sup> Craig Forsyth,<sup>1</sup> Alasdair

I. McKay,<sup>1</sup> Tanja Junkers,<sup>1</sup> Dragoslav Vidović<sup>1</sup>

<sup>1</sup>School of Chemistry, Monash University, Clayton 3800, Australia.

<sup>2</sup>Suzhou Institute of Biomedical Engineering and Technology, Chinese Academy of Sciences, Suzhou 215163, China.

### TABLE OF CONTENTS

|                                                                                                         |      |
|---------------------------------------------------------------------------------------------------------|------|
| I. General Remarks                                                                                      | S-2  |
| II. General synthetic procedures and catalytic examinations                                             | S-2  |
| III. Crystallographic methods                                                                           | S-3  |
| IV. Copies of <sup>1</sup> H, <sup>13</sup> C NMR and FTIR spectra, and GPC, MALDI-tof and TGA analyses | S-5  |
| V. References                                                                                           | S-14 |

**General Remarks:** All manipulations were carried out using standard Schlenk techniques and a dry-box. Toluene and hexane were distilled over sodium while CH<sub>2</sub>Cl<sub>2</sub>, 1,2-difluorobenzene, CDCl<sub>3</sub> and CD<sub>2</sub>Cl<sub>2</sub> were distilled over CaH<sub>2</sub>. All solvents were stored over 4 Å molecular sieves. The NMR spectra were recorded on a Bruker Avance III 400 (<sup>1</sup>H NMR at 400 MHz; <sup>13</sup>C NMR at 100 MHz, <sup>11</sup>B NMR at 128 MHz, <sup>19</sup>F NMR at 376 MHz and <sup>27</sup>Al NMR at 104 MHz) instrument. Tetramethylsilane was used as reference for <sup>1</sup>H and <sup>13</sup>C NMR, while <sup>11</sup>B, <sup>19</sup>F and <sup>27</sup>Al NMR spectra were recorded with respect to Et<sub>2</sub>O·BF<sub>3</sub>, CCl<sub>3</sub>F and AlCl<sub>3</sub>/D<sub>2</sub>O, respectively. The <sup>Dip</sup>LAI(OTf)<sub>2</sub><sup>S1</sup>, <sup>Ph</sup>LH<sup>S2</sup>, Na[BAr<sup>Cl</sup>]<sub>4</sub><sup>S3</sup>, <sup>Xyl</sup>LAI(OTf)<sub>2</sub><sup>S4</sup>, [<sup>n</sup>Bu<sub>4</sub>N]OTf<sup>S5</sup> and (C<sub>6</sub>F<sub>5</sub>)<sub>3</sub>B·OH<sub>2</sub><sup>S6</sup> were synthesized according to the literature procedures. All dienophiles and 2,3-dimethylbutadiene were distilled prior to use. All other reagents were used as received. Mass spectrometry was performed by Agilent 6220 TOF MS system with a multimode dual nebuliser ESI/APCI source. FTIR was recorded using Shimadzu *IR Prestige-21* instrument. MALDI-TOF measurements were performed on a Shimadzu-MALDI 7090 instrument using aCHCA and DCTB with AgTFA.

### General synthetic procedures and catalytic examinations

**Synthesis of <sup>Xyl</sup>LAI(OTf)<sub>2</sub>:** <sup>Xyl</sup>LAI(OTf)<sub>2</sub> (0.70 g, 1.74 mmol) and 2.1 equivalent of AgOTf (0.90 g, 3.50 mmol) were mixed in 20 mL 1,2-difluorobenzene. The reaction mixture was left to stir overnight in the absence of light. After filtration, the clear solution obtained was concentrated to 5 mL and transferred to a smaller Schlenk flask, following by layering with 10 mL hexane. Colorless crystals were grown in 2 days. After dryness under vacuum, the product was obtained as white solid. Yield: 0.72 g, 66%. <sup>1</sup>H NMR (400 MHz, CD<sub>2</sub>Cl<sub>2</sub>, 25 °C): δ 1.94 (6H, s, CH<sub>3</sub> on backbone), 2.26 (12H, s, ortho-CH<sub>3</sub>), 5.60 (1H, s, γ-CH), 7.18-7.19 (6H, m, ArH). <sup>13</sup>C NMR (100 MHz, CD<sub>2</sub>Cl<sub>2</sub>, 25 °C): δ 18.1 (s, CH<sub>3</sub> on backbone), 23.0 (s, CH<sub>3</sub> on Xyl), 99.8 (s, γ-C), 128.2 (s, ArC), 129.4 (s, ArC), 133.6 (s, ArC), 137.7 (s, ArC), 175.0 (s, CN). <sup>27</sup>Al NMR (104 Hz, CD<sub>2</sub>Cl<sub>2</sub>, 25 °C): δ 61.1 (sharp, s). <sup>19</sup>F NMR (376 Hz, CD<sub>2</sub>Cl<sub>2</sub>, 25 °C): δ -77.3 (sharp, s) HRMS (ESI) calculated for C<sub>23</sub>H<sub>26</sub>N<sub>2</sub>O<sub>6</sub>F<sub>6</sub>AlS<sub>2</sub> [M + H]: 631.0952; Found: 631.0957.

**Synthesis of <sup>Ph</sup>LAI(OTf)<sub>2</sub>:** A sample of <sup>Ph</sup>LH (1.0 g, 3.99 mmol) was added to a 100 mL Schlenk flask under nitrogen gas and dissolved in 40 mL of toluene under stirring. Flask was cooled with an ice bath before 1.30 mL of nBuLi (2.5M in hexane) was added and the reaction mixture was stirred for 1 hour. This solution was then transferred to a Schlenk flask containing 0.558 g (4.19 mmol) of AlCl<sub>3</sub> suspended in about 20 mL and the entire solution was left to stir overnight. The solution was then filtered, all volatiles removed under reduced pressure and the resulting residue was washed three times with 5 mL portions of *n*-hexane. After drying under reduced pressure, pale yellow was collected. Yield: 1.11 g, 80 %. <sup>1</sup>H NMR (400 MHz, CDCl<sub>3</sub>, 25 °C): δ 1.84 (s, 6H, CH<sub>3</sub>), 5.14 (s, 1H, CH), 7.14 (m, 4H, ortho-Ph) 7.23 (m, 2H, para-Ph), 7.34 (m, 4H, meta-Ph) ppm. <sup>13</sup>C NMR (100 MHz, CDCl<sub>3</sub>, 25 °C): δ 23.4 (CH<sub>3</sub>), 126.8 (meta-C-Ph), 127.1 (para-C-Ph), 129.4 (ortho-C-Ph), 142.4 (CN of Ph), 171.0 (CN of ligand) ppm. <sup>27</sup>Al NMR (104 Hz, DCM, 25 °C): δ 99.6 (sharp, s). HRMS (ESI) calculated for C<sub>17</sub>H<sub>17</sub>N<sub>2</sub>AlCl<sub>2</sub> [M + H]: 347.0662; Found: 347.0673.

**Synthesis of <sup>Ph</sup>LAI(OTf)<sub>2</sub>:** The same procedure was followed as described for <sup>Xyl</sup>LAI(OTf)<sub>2</sub>: using 0.28 g (0.81 mmol) of <sup>Ph</sup>LAI(OTf)<sub>2</sub> while obtaining 0.10 g (23%) of the crystalline product. <sup>1</sup>H NMR (400 MHz, CD<sub>2</sub>Cl<sub>2</sub>, 25 °C): δ 1.95 (s, 6H, CH<sub>3</sub>), 5.44 (s, 1H, CH), 7.15 (m, 4H, ortho-Ph) 7.32 (m, 2H, para-Ph), 7.41 (m, 4H, meta-Ph) ppm. <sup>13</sup>C NMR (100 MHz, CD<sub>2</sub>Cl<sub>2</sub>, 25 °C): δ 23.3 (CH<sub>3</sub>), 100.1 (CH of ligand), 126.2 (meta-C-Ph), 128.1 (para-C-Ph), 129.9 (ortho-C-Ph), 140.1 (CN of Ph), 174.3 (CN of ligand) ppm. <sup>27</sup>Al NMR (104 Hz, CD<sub>2</sub>Cl<sub>2</sub>, 25 °C): δ 66.7 (sharp, s). <sup>19</sup>F NMR (376 Hz, CD<sub>2</sub>Cl<sub>2</sub>, 25 °C): δ -77.8 (sharp, s) HRMS (ESI) calculated for C<sub>19</sub>H<sub>17</sub>N<sub>2</sub>O<sub>6</sub>F<sub>6</sub>AlS<sub>2</sub> [M + H]: 575.0326; Found: 575.0353.

**General procedure for aluminum-catalyzed Diels-Alder reactions:** NaBAr<sup>Cl</sup><sub>4</sub> (10 mg, 0.016 mmol) and 1 equivalent of <sup>Ar</sup>LAI(OTf)<sub>2</sub> (Ar = Dip or Xyl) was dissolved in 1 mL CD<sub>2</sub>Cl<sub>2</sub> in a J. Young NMR tube. To this solution the diene 2,3-dimethyl-1,3-butadiene (52 mg, 72 μL, 0.64 mmol) and a dienophile (0.5 equiv with respect to the diene) was added. The reaction mixture was left for the time indicated in Tables 1 in the main text. After reaction completion, the corresponding products were purified by flash column chromatography on silica gel using hexane/ethyl acetate mixtures affording analytically pure Diels-Alder products. The trans/cis ratio (if applicable) was determined by <sup>1</sup>H NMR spectroscopy.

**Table S1.**  $\text{Dip}^{\text{LAI}}(\text{OTf})_2/\text{[BAR}^{\text{Cl}}_4\text{]}$ ,  $\text{Xyl}^{\text{LAI}}(\text{OTf})_2/\text{Na[BAR}^{\text{Cl}}_4\text{]}$  and  $^t\text{BuCl/AgOTf}$  (HBA) catalysed Diels-Alder reactions between 2,3-dimethyl-1,3-butadiene (**3**) and various dienophiles (**4-11**). The results are listed as: time (h), yield (%) and *trans/cis* or *endo:exo* for each run.

| # | Enone | Adduct | $\text{Dip}^{\text{LAI}}(\text{OTf})_2$<br>/ $\text{Na[BAR}^{\text{Cl}}_4\text{]}$ | $\text{Xyl}^{\text{LAI}}(\text{OTf})_2$<br>/ $\text{Na[BAR}^{\text{Cl}}_4\text{]}$ | HBA                                 |
|---|-------|--------|------------------------------------------------------------------------------------|------------------------------------------------------------------------------------|-------------------------------------|
| 1 |       |        | 1 h<br>96 %                                                                        | 1 h<br>98 %                                                                        | 1 h<br>90 %                         |
| 2 |       |        | 1 h<br>96 %                                                                        | 1 h<br>91 %                                                                        | 1 h<br>89 %                         |
| 3 |       |        | 12 h<br>93 %<br>99:1                                                               | 12 h <sup>b</sup><br>86 %<br>99:1                                                  | 24 h<br>58 %<br>99:1                |
| 4 |       |        | 6 h<br>80 %<br>99:1                                                                | 3 h<br>97 %<br>99:1                                                                | 24 h<br>33 % <sup>[c]</sup><br>99:1 |
| 5 |       |        | 2 h <sup>[a]</sup><br>92 %<br>99:1                                                 | -                                                                                  | 1 h <sup>[d]</sup><br>-             |
| 6 |       |        | 24 h<br>87 %<br>99:1                                                               | 24 h<br>23 %<br>99:1                                                               | 1 h <sup>[d]</sup><br>-             |

<sup>[a]</sup>10% of the catalytic system used. <sup>[b]</sup>15 % of the catalyst used. <sup>[c]</sup>9% conversion as estimated by <sup>1</sup>H NMR spectroscopy. <sup>[d]</sup>diene polymerization occurred within the first hour with no evidence for the formation of the product.

**General procedure for Aluminum-catalyzed polymerization of cyclopentenone:** In a majority of performed polymerization studies 2.5 mol% of the Xyl-based catalytic system was used with respect to cyclopentenone. A typical procedure is as following:  $\text{Xyl}^{\text{LAI}}(\text{OTf})_2$  (28 mg, 0.044 mmol) and  $\text{NaBAR}^{\text{Cl}}_4$  (28 mg, 0.044 mmol) were dissolved in 2 mL of DCM in a 10 mL round-bottomed flask containing a stir bar in the glove box. To this solution, 2-cyclopenten-1-one (150  $\mu\text{L}$ , 1.78 mmol) was added. The reaction mixture was left to stir for 3h and then quenched with 20 mL of methanol. Addition of methanol also resulted in precipitation of the polymer. This crude material was isolated through filtration, re-dissolved in 0.5 mL of THF, and then precipitated twice into 20 mL of methanol. The obtained polymer was dried under vacuum at 40 °C overnight. Yield: 87 mg, 59%. <sup>1</sup>H NMR (400 MHz,  $\text{CD}_2\text{Cl}_2$ , 25 °C):  $\delta$  1.0 – 3.5 ppm (broad, aliphatic). <sup>13</sup>C NMR (100 MHz,  $\text{CD}_2\text{Cl}_2$ , 25 °C):  $\delta$  20-25, 38-40, 49-51 (all aliphatic), 119-121 (carbonyl). FTIR (KBr pellets): 1728  $\text{cm}^{-1}$  (C=O stretch). GPC:  $M_n$  = 36000,  $M_w$  = 59900,  $\bar{D}$  = 1.66.

Polymerization of cyclopentenone involving  $\text{Dip}^{\text{LAI}}(\text{OTf})_2$  or  $\text{Ph}^{\text{LAI}}(\text{OTf})_2$  was performed according to the procedure described above except that 5 mol% of these catalytic systems were used. According to the <sup>1</sup>H NMR spectroscopic studies, 75 and 16 % of cyclopentenone was consumed after 5 h and 6 days, respectively, for these two catalytic systems. Please also see Figure S16 for more details.

Polymerization studies involving 2-cyclohexen-1-one and 2-cyclohepten-1-one using the Xyl-based catalytic system were performed the abovementioned procedure resulting in insoluble materials in yields of 50% (6 h) and 23% (24 h), respectively. Due to poor solubilities in most common organic solvents, these materials have been characterized by FTIR only.

2-cyclohexen-1-one: FTIR (KBr pellets): 1707  $\text{cm}^{-1}$  (C=O stretch).

2-cyclohepten-1-one: FTIR (KBr pellets): 1681  $\text{cm}^{-1}$  (C=O stretch).

**Crystallographic methods:** A crystal was mounted onto a nylon loop and placed in the cold  $\text{N}_2$  stream (T 123 K) of a Rigaku Synergy S diffractometer, fitted with a HyPix6000 hybrid photon counting detector. Data were collected using CuK $\alpha$  ( $\lambda = 1.54178$  Å) radiation and processed, including an empirical absorption correction (multi-scan) with the proprietary software CrysAlisPro.<sup>S7</sup> The structure was solved and refined by conventional methods using the SHELX2018 software.<sup>S8</sup> Non-hydrogen atoms were refined with anisotropic displacement parameters and hydrogen atoms were placed in calculated positions using a riding model.

Crystallographic data for  $\text{XylLAi(OTf)}_2$ :  $\text{C}_{23}\text{H}_{25}\text{AlF}_6\text{N}_2\text{O}_6\text{S}_2$ ,  $M_r$  630.55, Triclinic, P-1,  $a = 9.4060(2)$  Å,  $b = 11.1167(2)$  Å,  $c = 15.5637(3)$  Å,  $\alpha = 75.810(2)^\circ$ ,  $\beta = 72.977(2)^\circ$ ,  $\gamma = 66.135(2)^\circ$ ,  $V = 1408.04(5)$  Å<sup>3</sup>,  $Z = 2$ ,  $\rho_c = 1.487$  g cm<sup>-3</sup>,  $T = 123(2)$  K,  $\lambda = 1.54184$  Å; 28857 reflections collected, 5837 independent reflections ( $R_{\text{int}} = 5.75\%$ ), which were used in all calculations;  $R_1 = 0.0396$ ,  $wR_2 = 0.1015$  for  $I > 2\sigma(I)$  and  $R_1 = 0.0455$ ,  $wR_2 = 0.1059$  for all unique reflections; maximum and minimum residual electron densities 0.379 and -0.421 eÅ<sup>-3</sup>. CDCC: 2175768.

Crystallographic data for  $\text{PhLAiCl}_2$ :  $\text{C}_{41}\text{H}_{42}\text{AlCl}_4\text{N}_4$ ,  $M_r$  786.54, Monoclinic,  $P2_1/n$ ,  $a = 6.29940(10)$  Å,  $b = 22.3513(4)$  Å,  $c = 14.5043(2)$  Å,  $\beta = 90.5240(10)^\circ$ ,  $V = 2042.12(6)$  Å<sup>3</sup>,  $Z = 2$ ,  $\rho_c = 1.279$  g cm<sup>-3</sup>,  $T = 123(2)$  K,  $\lambda = 1.54178$  Å; 26370 reflections collected, 4275 independent reflections ( $R_{\text{int}} = 6.92\%$ ), which were used in all calculations;  $R_1 = 0.0483$ ,  $wR_2 = 0.1346$  for  $I > 2\sigma(I)$  and  $R_1 = 0.0517$ ,  $wR_2 = 0.1383$  for all unique reflections; maximum and minimum residual electron densities 0.497 and -0.466 eÅ<sup>-3</sup>. CDCC: 2175769.

Crystallographic data for  $\text{PhLAi(OTf)}_2$ :  $\text{C}_{19}\text{H}_{17}\text{AlF}_6\text{N}_2\text{O}_6\text{S}_2$ ,  $M_r$  574.45, Monoclinic,  $C2/c$ ,  $a = 20.7709(3)$  Å,  $b = 10.35930(10)$  Å,  $c = 13.0575(2)$  Å,  $\beta = 118.364(2)^\circ$ ,  $V = 2472.31(7)$  Å<sup>3</sup>,  $Z = 4$ ,  $\rho_c = 1.543$  g cm<sup>-3</sup>,  $T = 123(2)$  K,  $\lambda = 1.54178$  Å; 16389 reflections collected, 2606 independent reflections ( $R_{\text{int}} = 6.57\%$ ), which were used in all calculations;  $R_1 = 0.0416$ ,  $wR_2 = 0.1200$  for  $I > 2\sigma(I)$  and  $R_1 = 0.0449$ ,  $wR_2 = 0.1235$  for all unique reflections; maximum and minimum residual electron densities 0.287 and -0.344 eÅ<sup>-3</sup>. CDCC: 2175770.

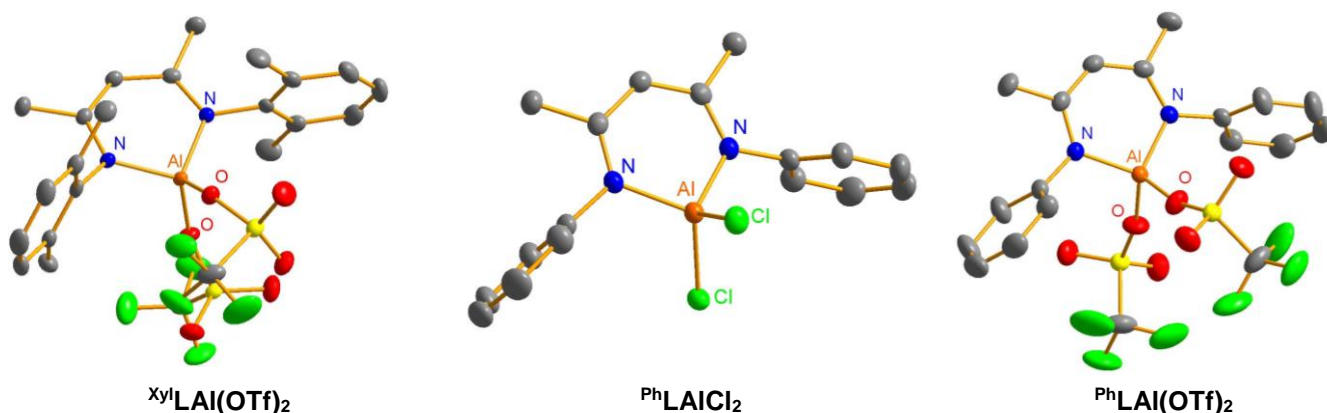

**Figure S1.** Molecular structures (ellipsoids drawn at 50% probability) for  $\text{XylLAi(OTf)}_2$ ,  $\text{PhLAiCl}_2$  and  $\text{PhLAi(OTf)}_2$  as analyzed by single crystal X-ray diffraction. The hydrogen atoms and disordered solvent molecules were omitted for clarity.

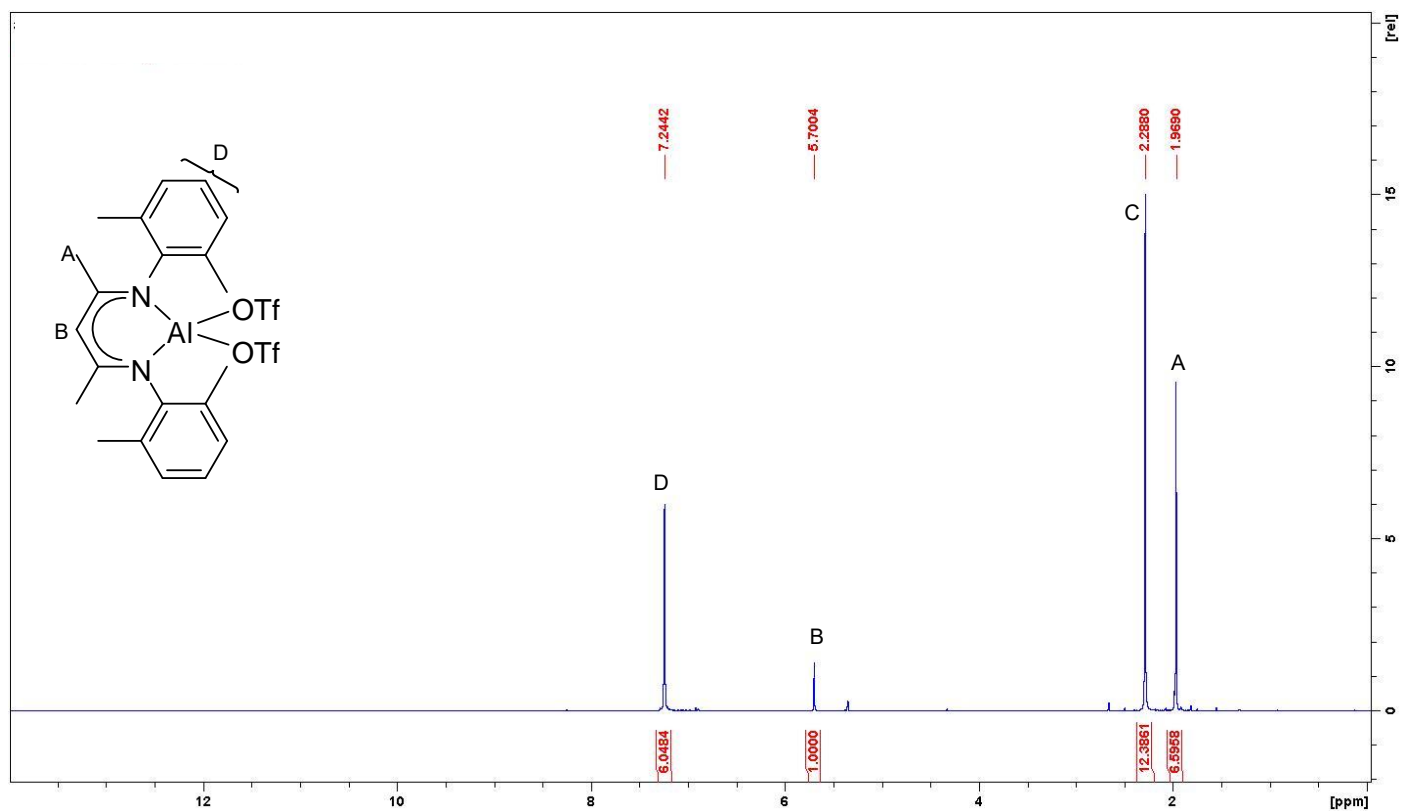

Figure S2.  $^1\text{H}$  NMR for  $\text{xyl-LAI(OTf)}_2$  in  $\text{CD}_2\text{Cl}_2$ .

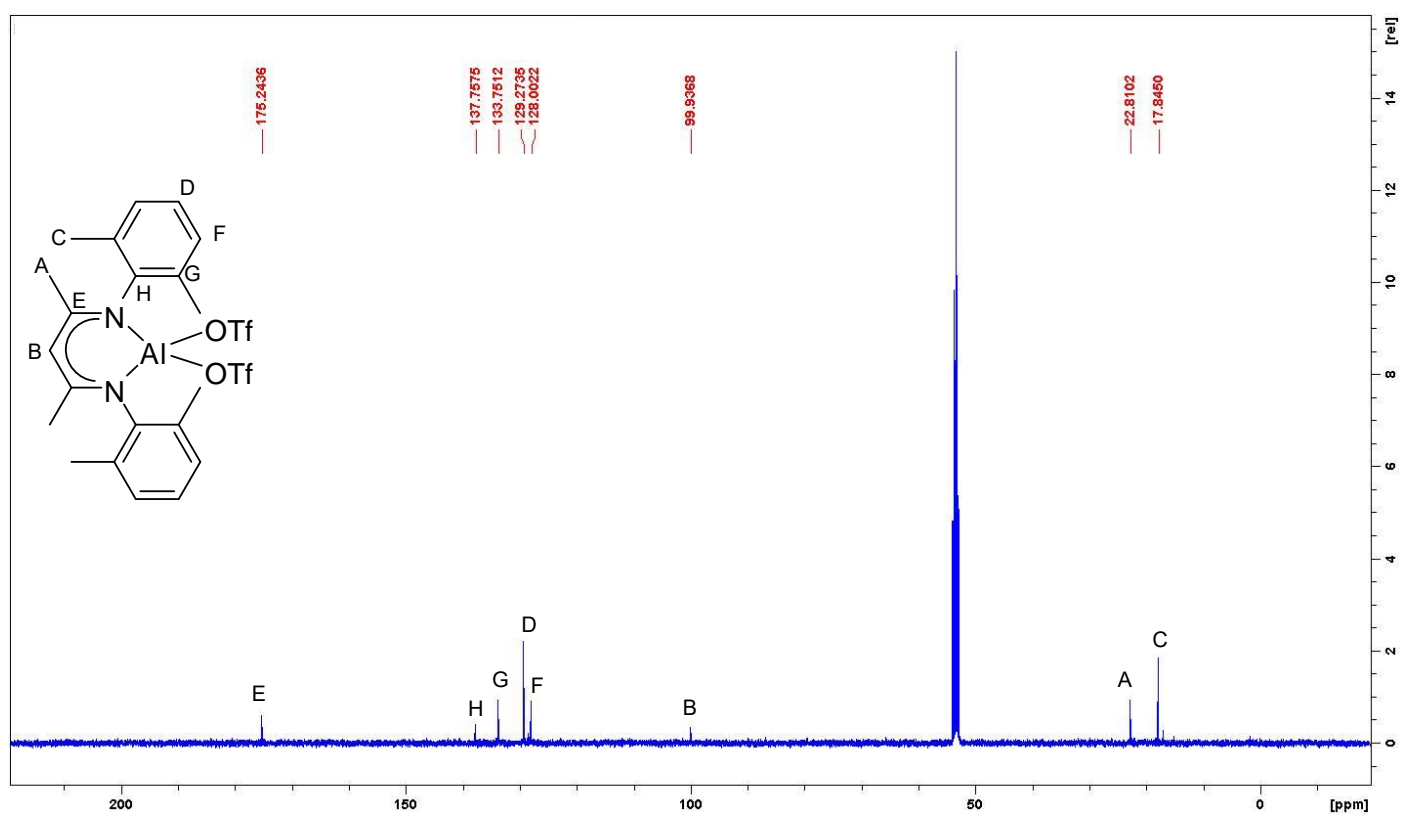

Figure S3.  $^{13}\text{C}$  NMR for  $\text{xyl-LAI(OTf)}_2$  in  $\text{CD}_2\text{Cl}_2$ .

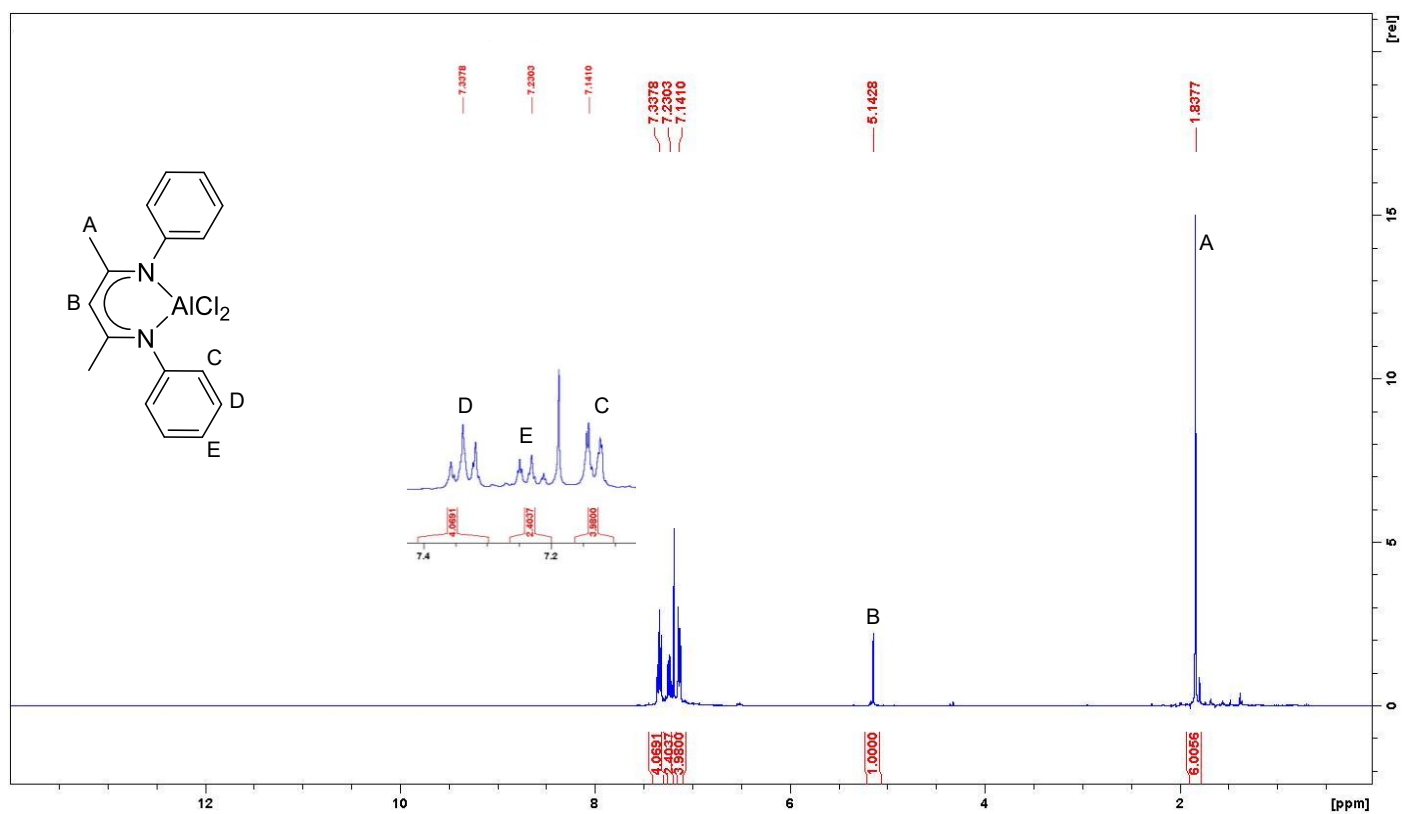

Figure S4.  $^1\text{H}$  NMR for  $\text{PhLAICl}_2$  in  $\text{CDCl}_3$ .

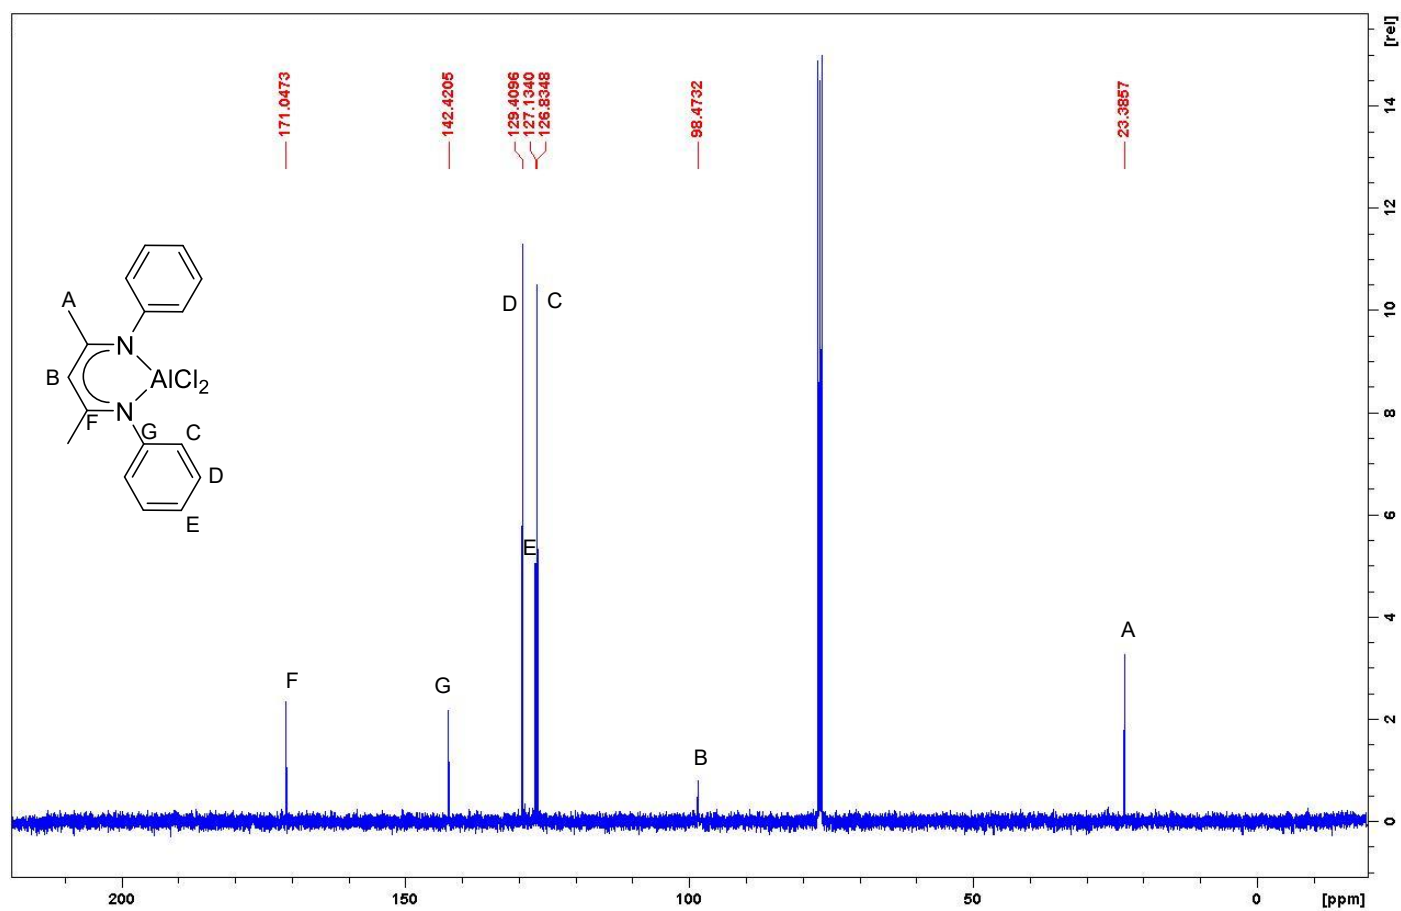

Figure S5.  $^{13}\text{C}$  NMR for  $\text{PhLAICl}_2$  in  $\text{CDCl}_3$ .

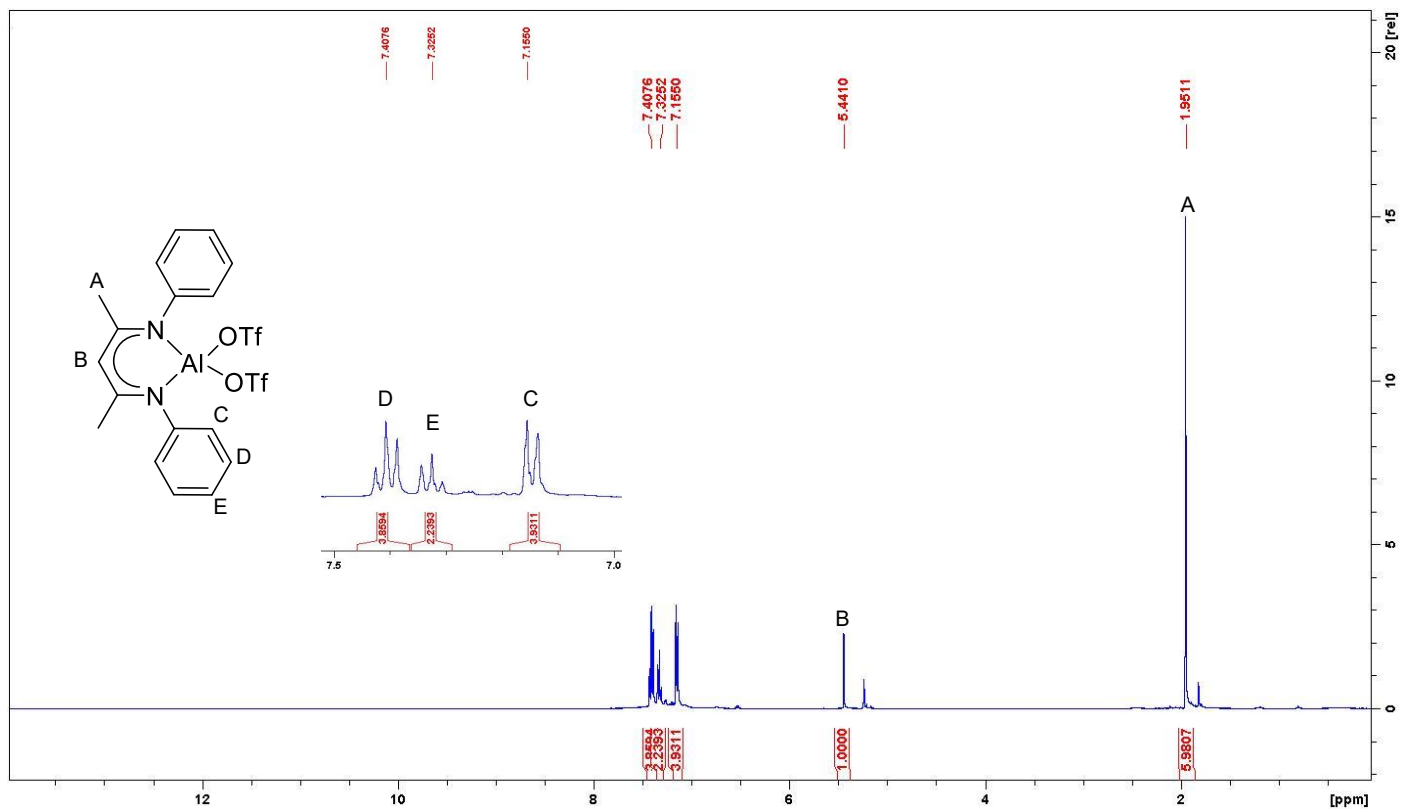

Figure S6.  $^1\text{H}$  NMR for  $\text{PhLAI}(\text{OTf})_2$  in  $\text{CD}_2\text{Cl}_2$ .

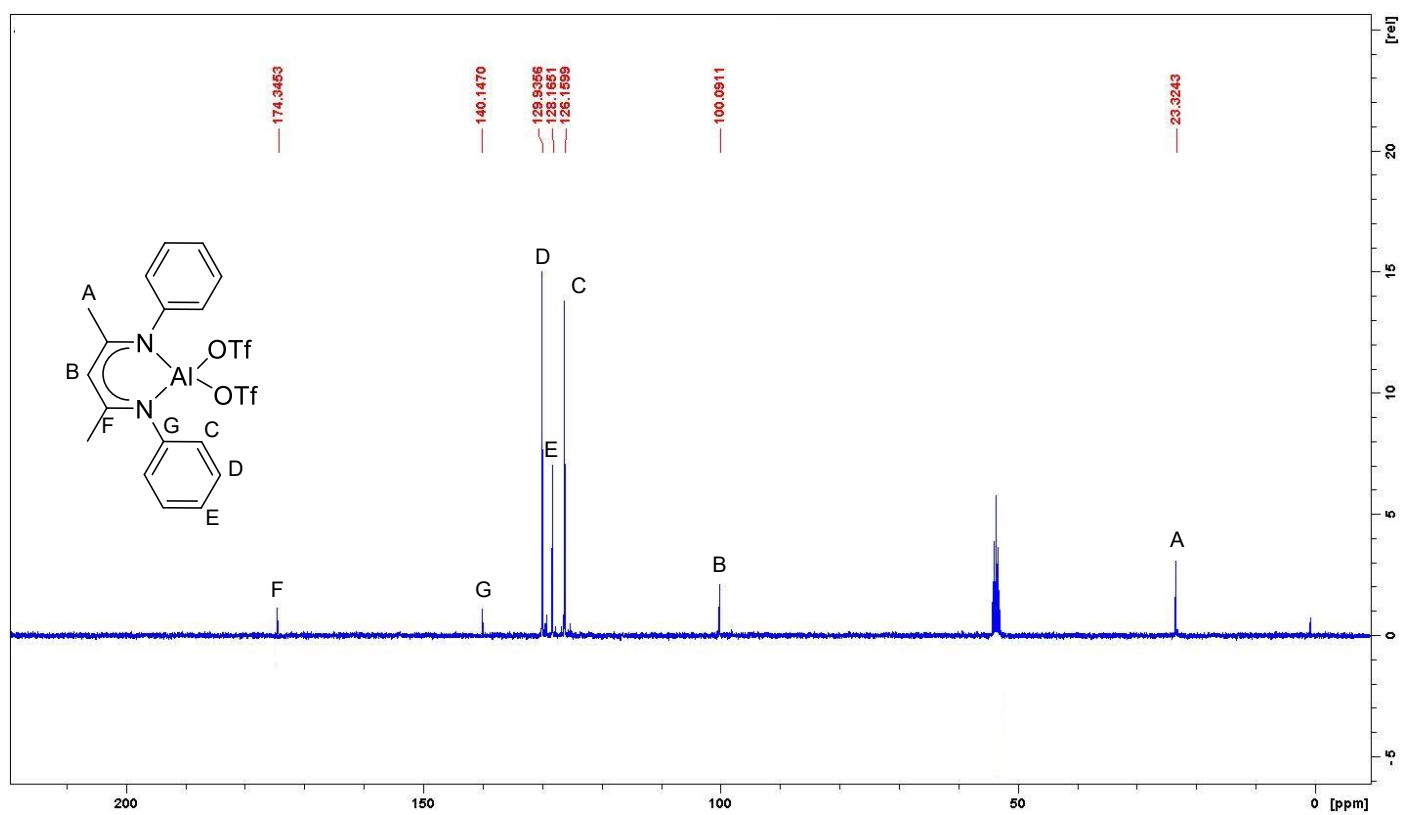

Figure S7.  $^{13}\text{C}$  NMR for  $\text{PhLAI}(\text{OTf})_2$  in  $\text{CD}_2\text{Cl}_2$ .

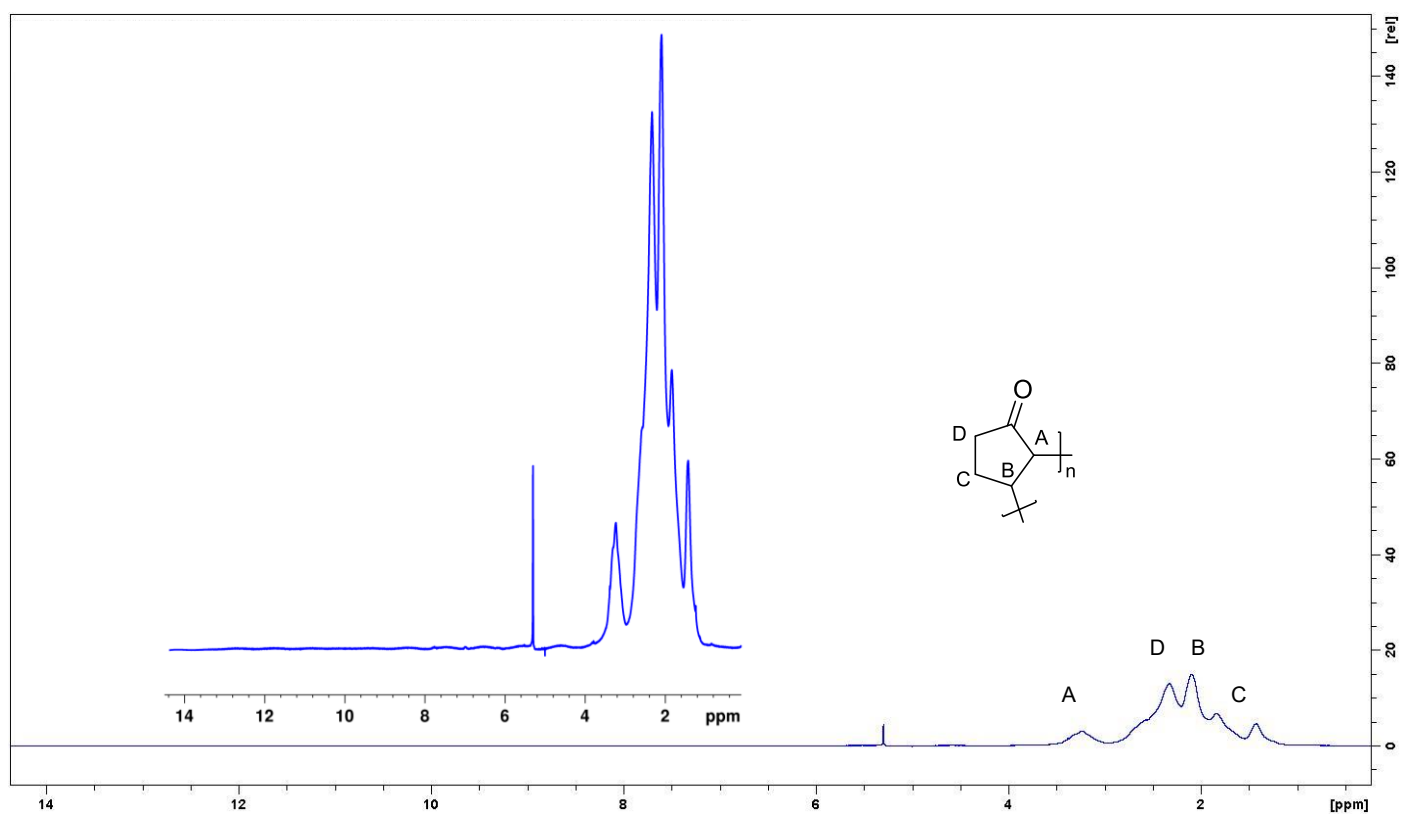

Figure S8.  $^1\text{H}$  NMR for the polycyclopentenone in  $\text{CD}_2\text{Cl}_2$ .

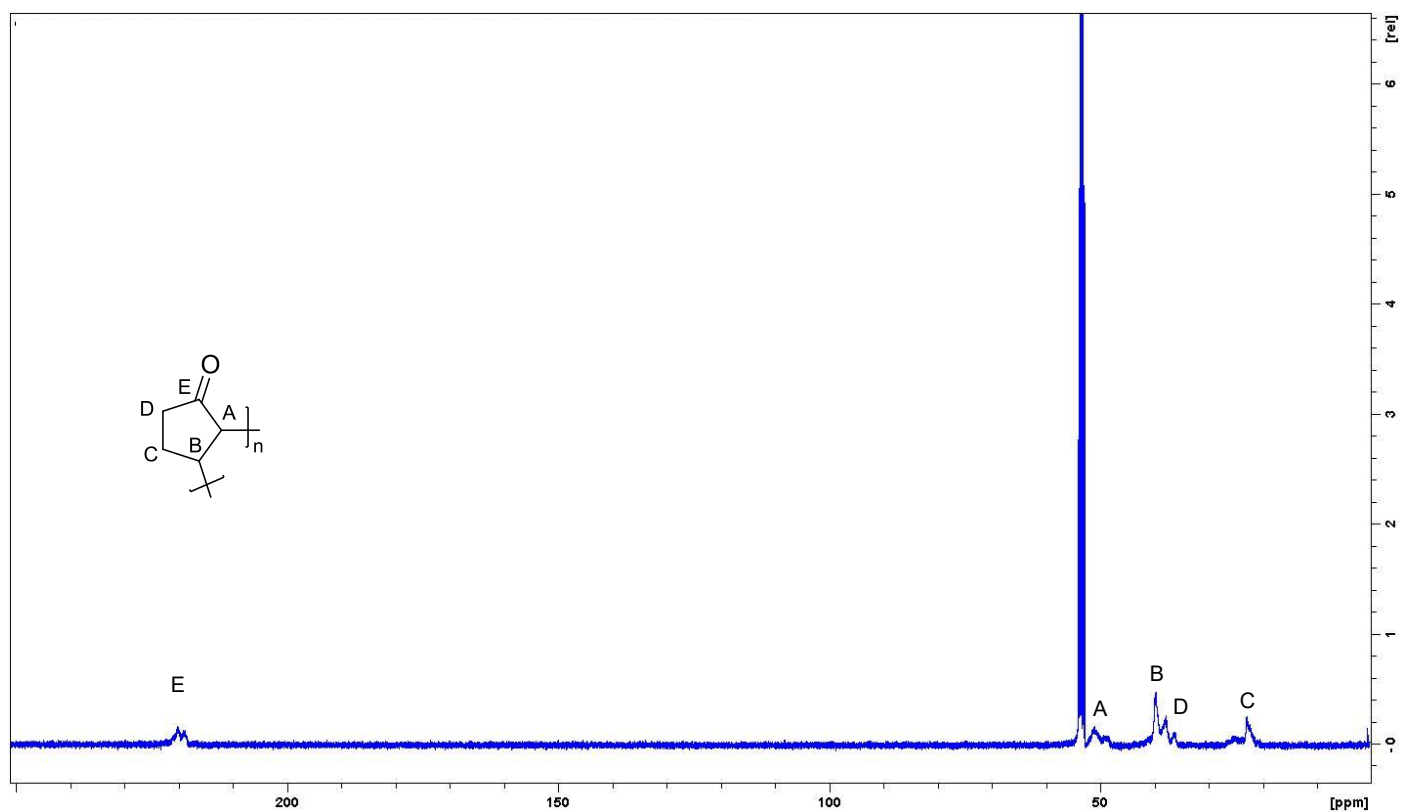

Figure S9.  $^{13}\text{C}$  NMR for polycyclopentenone in  $\text{CD}_2\text{Cl}_2$ .

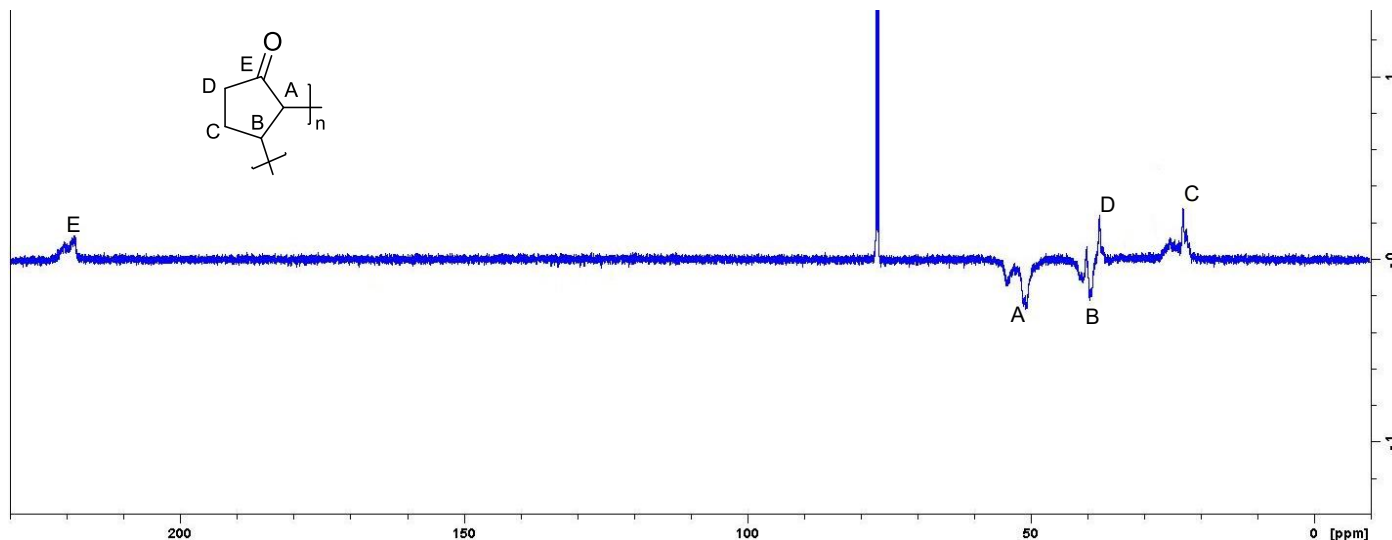

Figure S10. DEPT  $^{13}\text{C}$  NMR for the polymer. This spectrum shows that the polymer contains both CH (signals A and B) and  $\text{CH}_2$  (signals D and C) fragments.

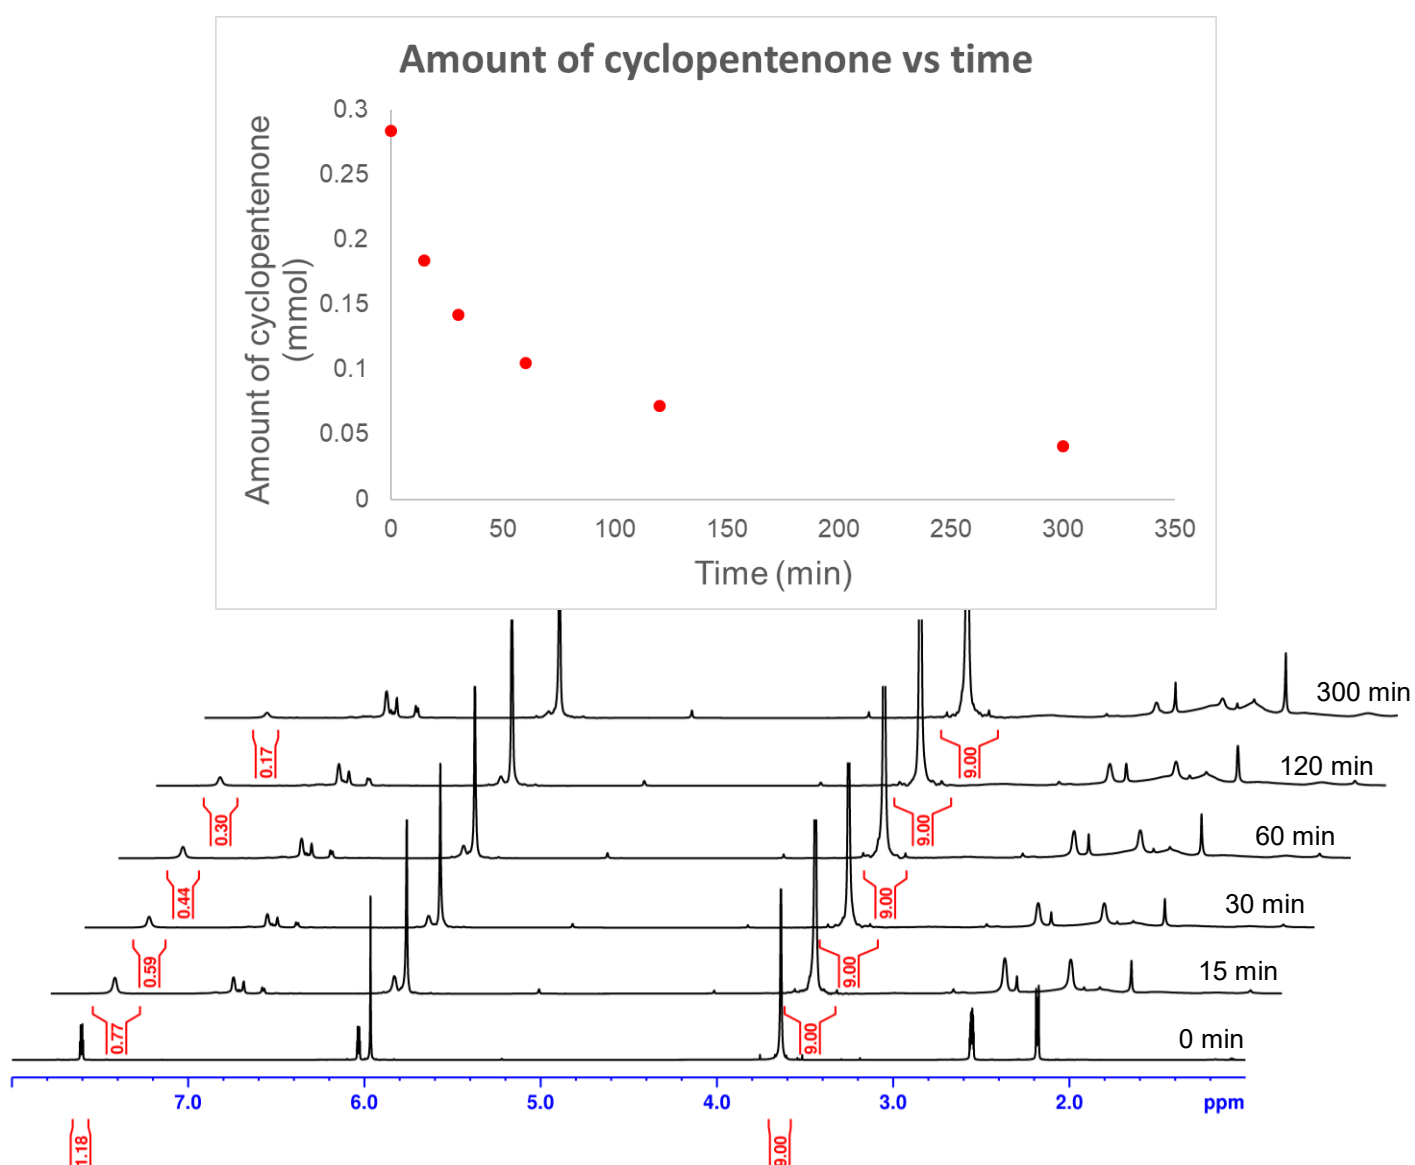

Figure S11. Disappearance of cyclopentenone in the presence of 2.5% of  $^{\text{xyl}}\text{LA}(\text{OTf})_2/\text{NaBAr}^{\text{Cl}_4}$  as observed by the  $^1\text{H}$  NMR spectroscopy (bottom; using 1,3,5-trimethoxybenzene as a standard) and a plot of the obtained data (top).

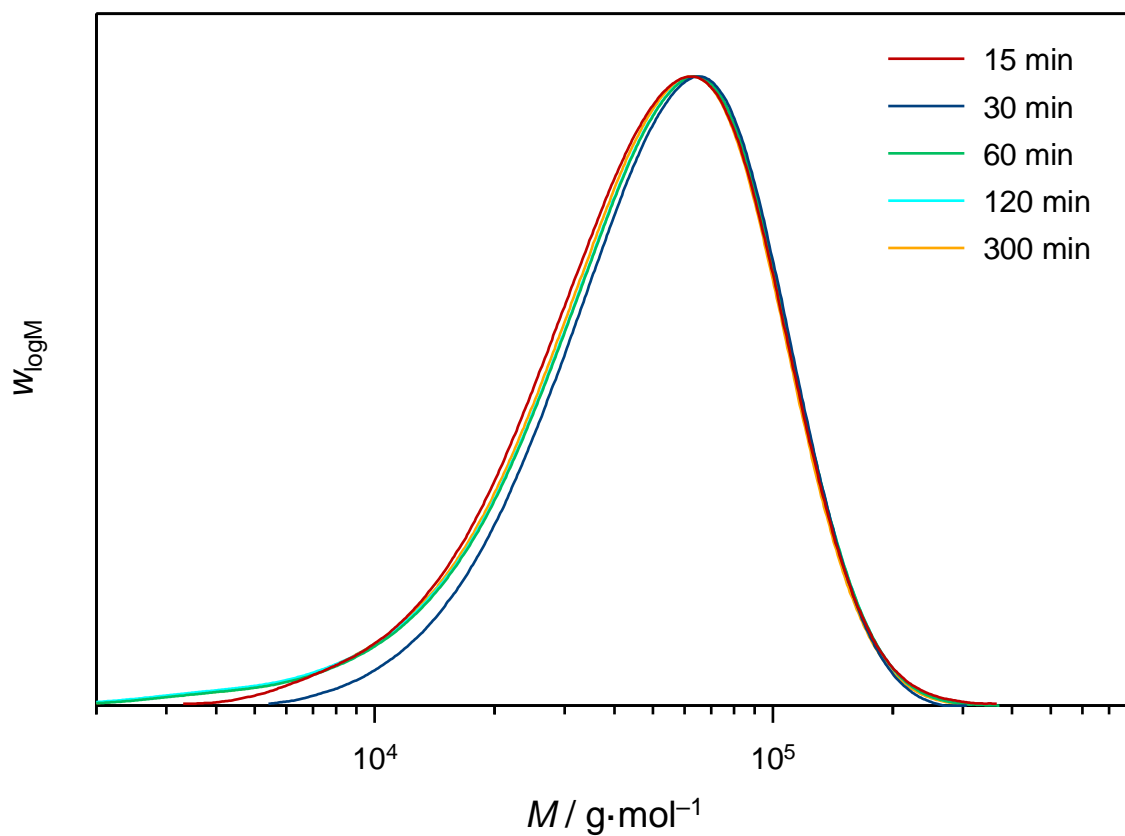

Figure S12. Molar mass distributions obtained from SEC for poly(cyclopentenone) taken at 15 min (brown), 1h (blue), 3h (purple) and 5h (red) after onset of the reaction using 2.5% catalyst loading (relative to polystyrene standards).

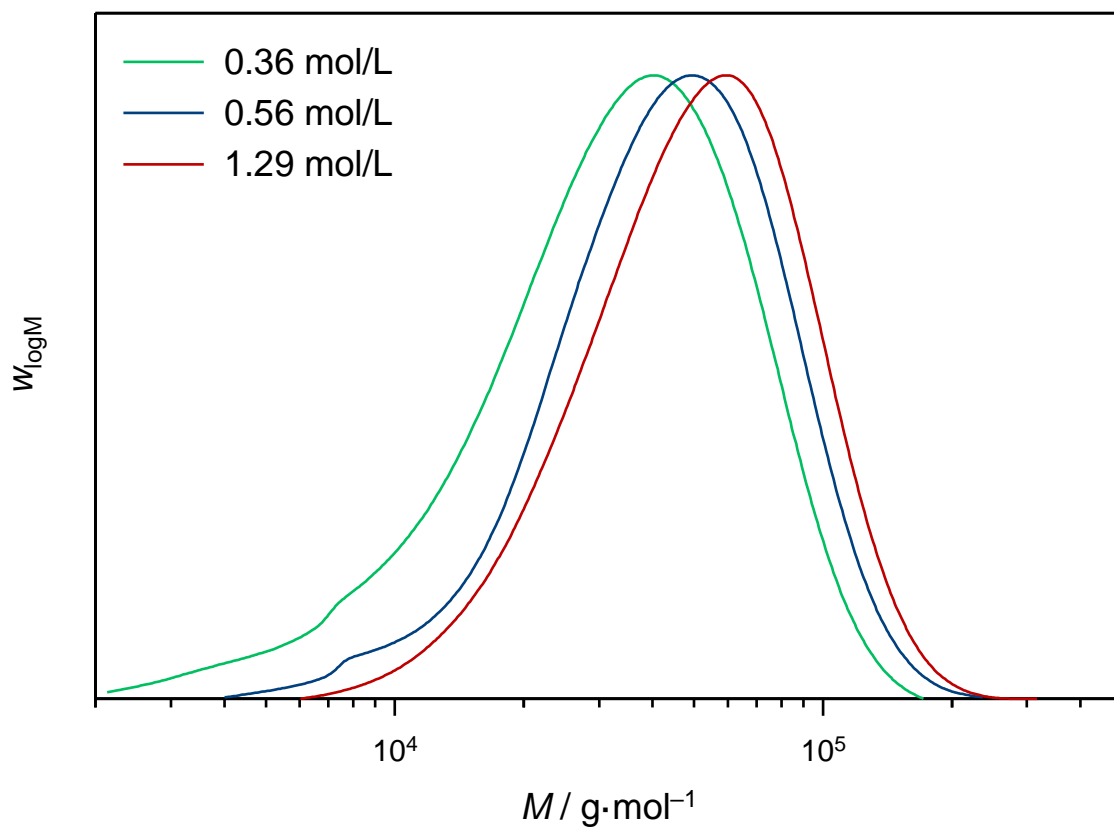

Figure S13. Molar mass distributions obtained from SEC for poly(cyclopentenone) obtained at 1.29 M (red), 0.56 M (green) and 0.36 M (Blue) concentration of the monomer using 2.5% catalyst loading (relative to polystyrene standards).

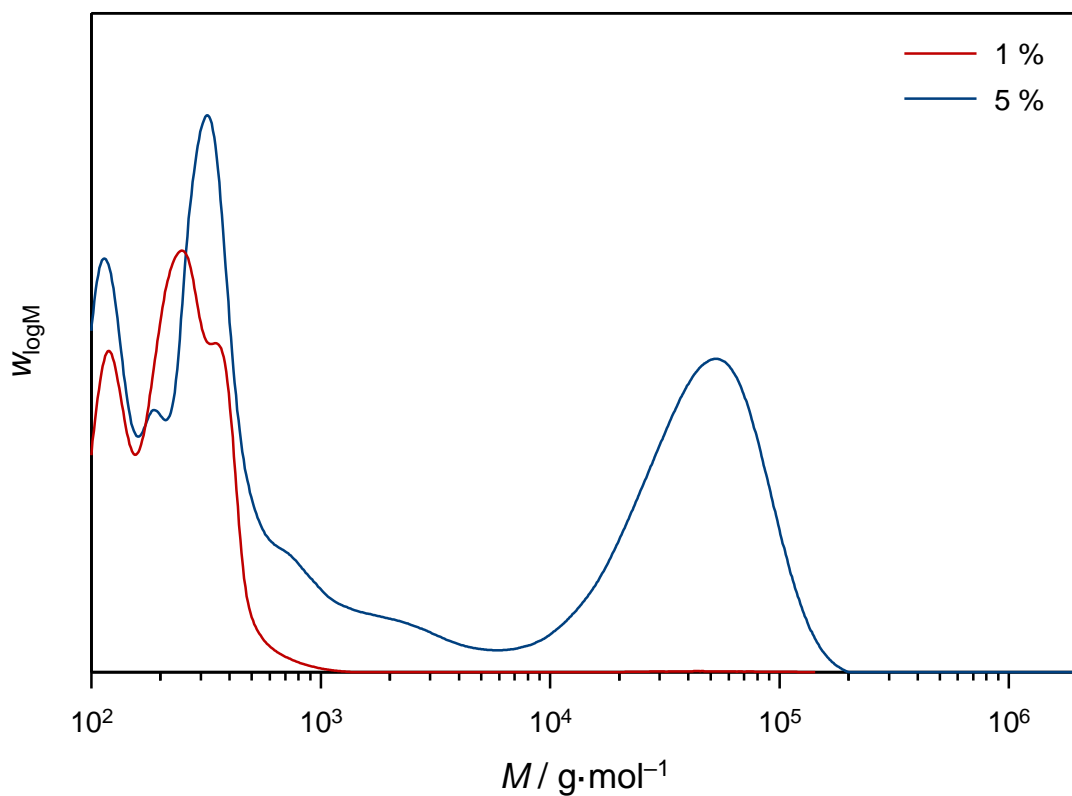

Figure S14. Molar mass distributions obtained from SEC for poly(cyclopentenone) obtained using 1% (red) and 5% (blue) of the catalyst (relative to polystyrene standards).

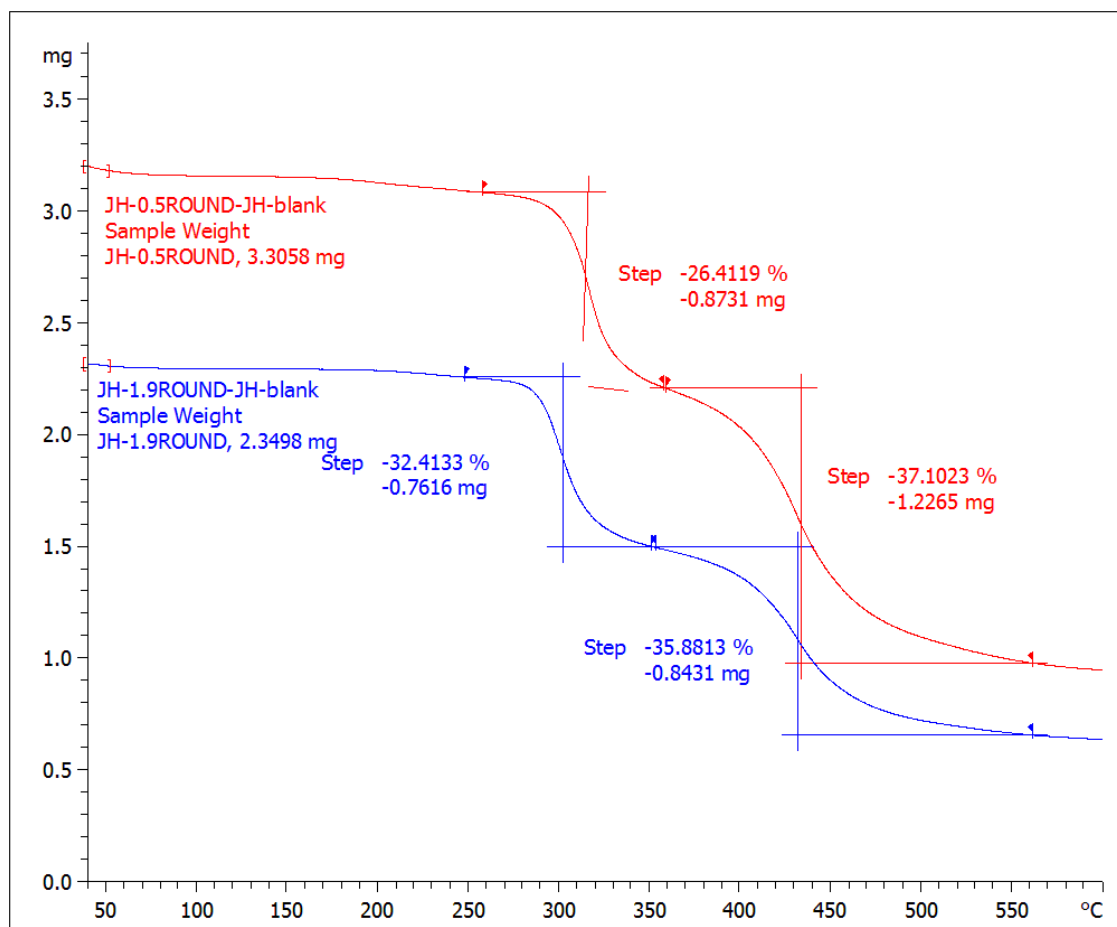

Figure S15. TGA analysis of two independently prepared polymer samples.

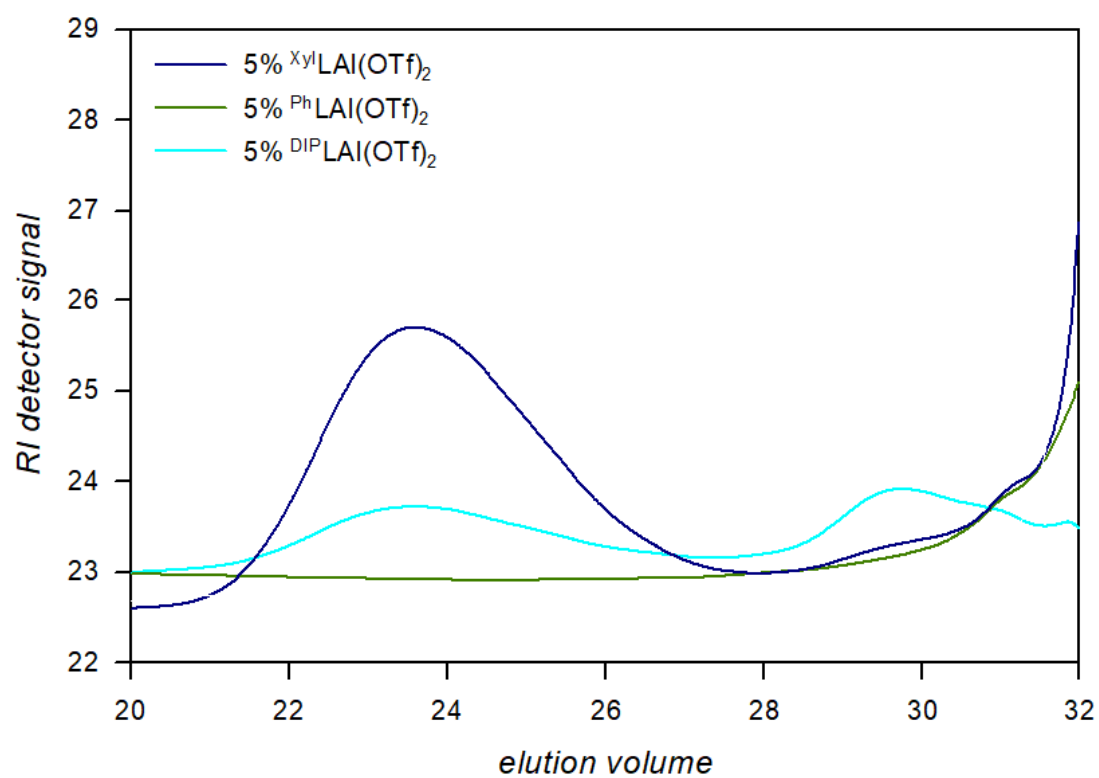

Figure S16. SEC elugrams for polymers obtained when using different aluminium-based Lewis acid complexes in the polymerisation of cyclopentenone.

Shimadzu MALDI-7090: Tuning Reflectron, Power 99, P.Ext at 1500.00 (bin 201), Ion Gate Blanking: 700.00, Laser Diameter: 100

Processed data (averaged) : 0.2 mV (sum=39.6 mV), Smoothed = 5, profiles # 1 - 258

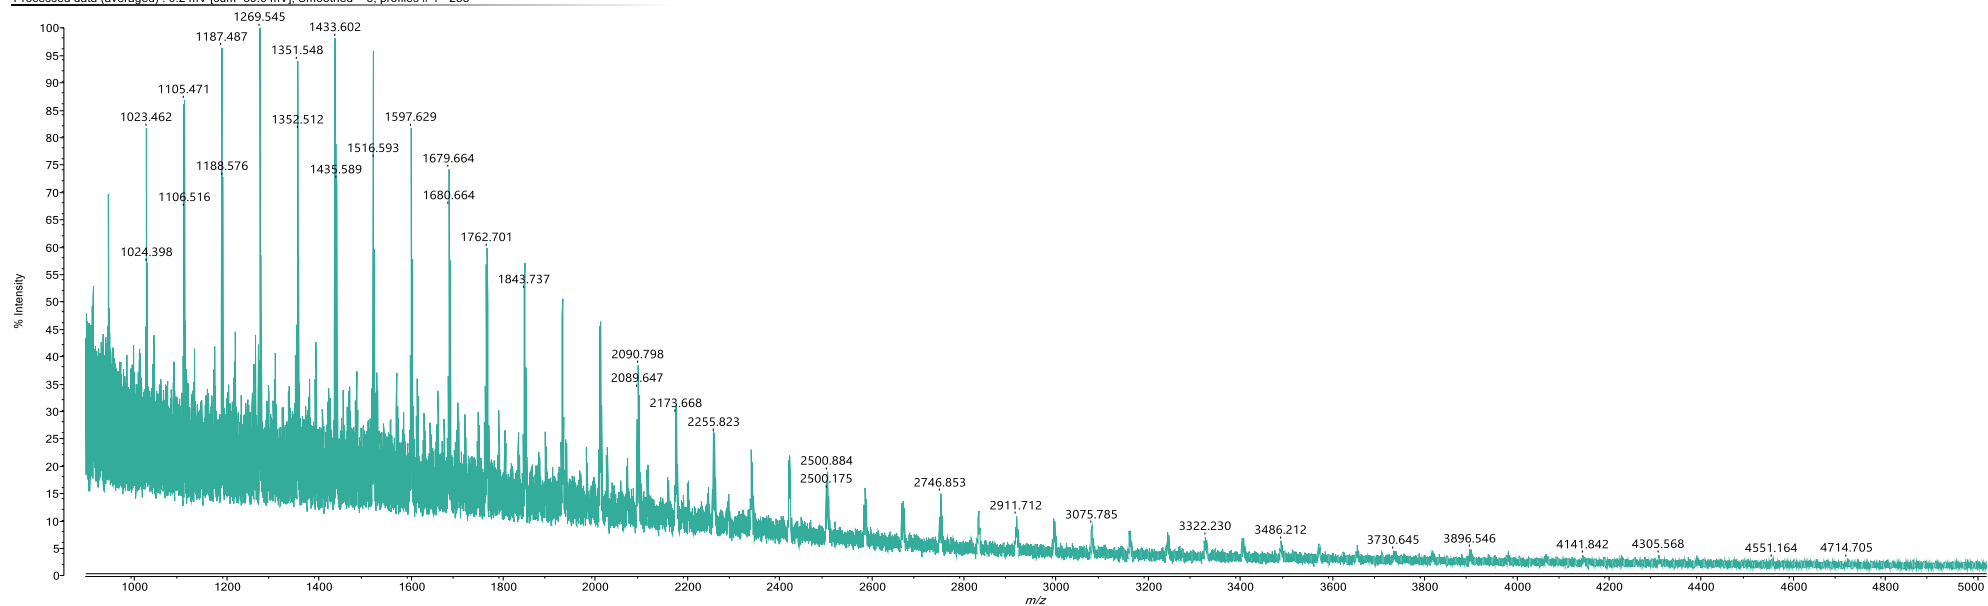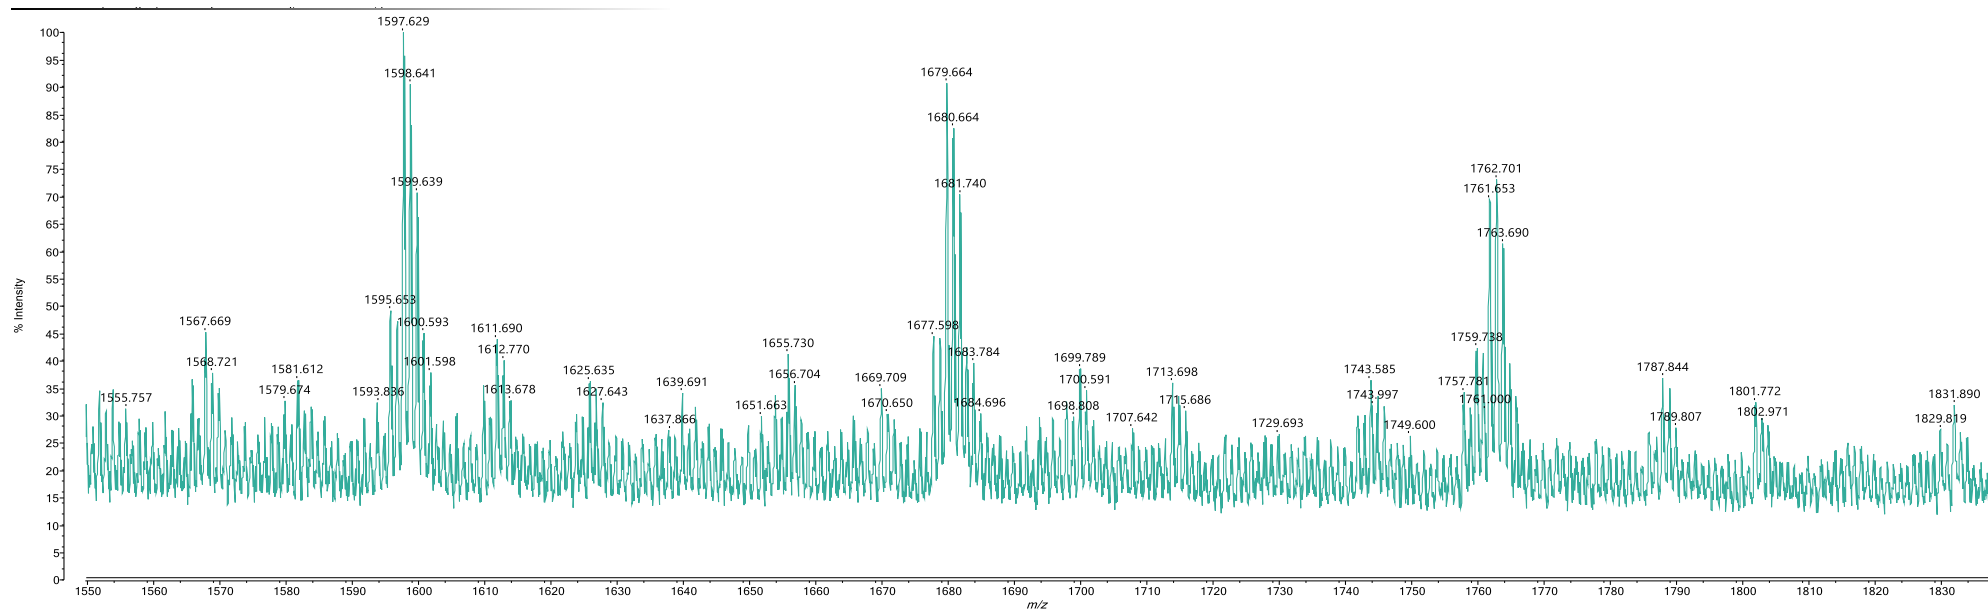

Figure S17. A typical MALDI-ToF mass spectrum of poly(cyclopentanone). The calculated molecular weight (exact mass) of the monomer ( $C_5H_6O$ ) i.e. the repeating unit is 82.042.

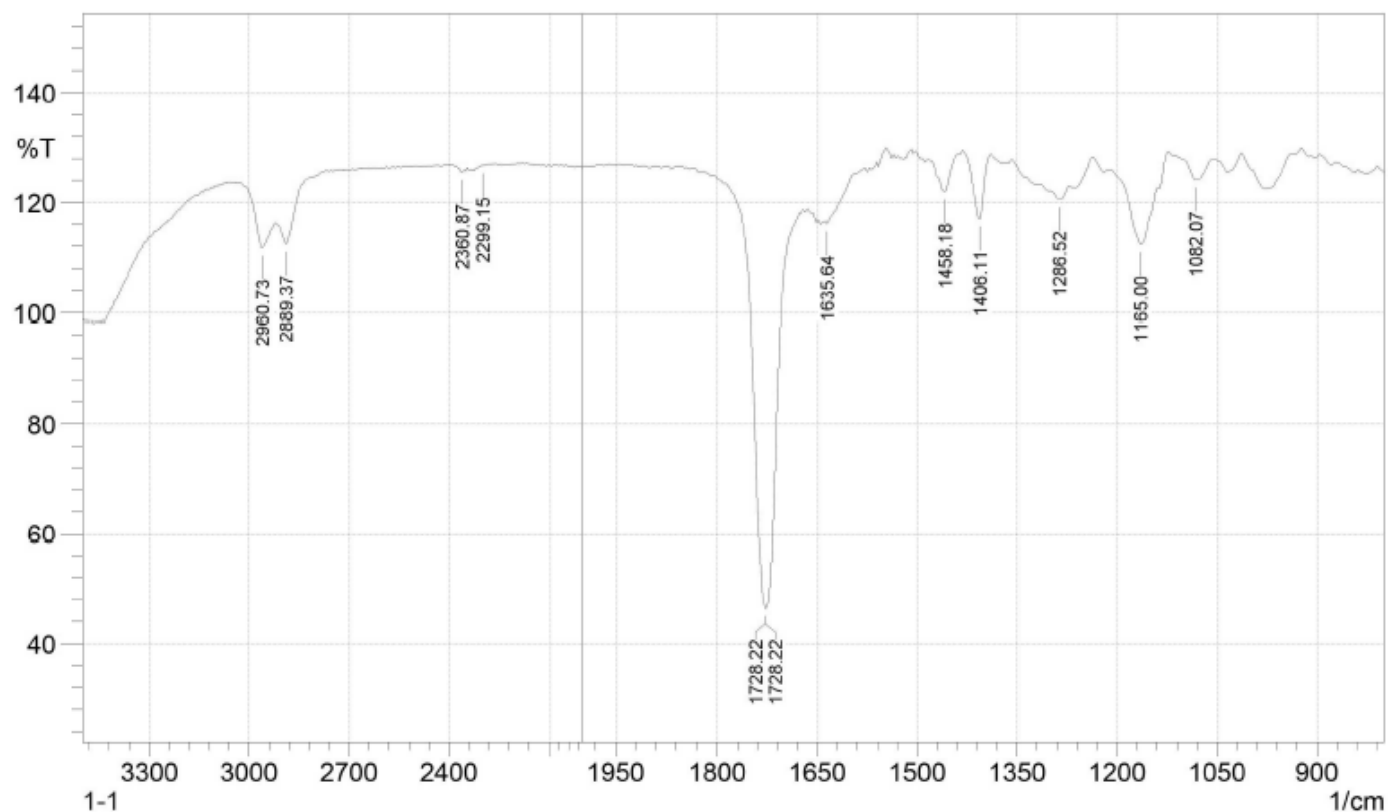

Figure S18. The FTIR spectrum for poly(cyclopentenone).

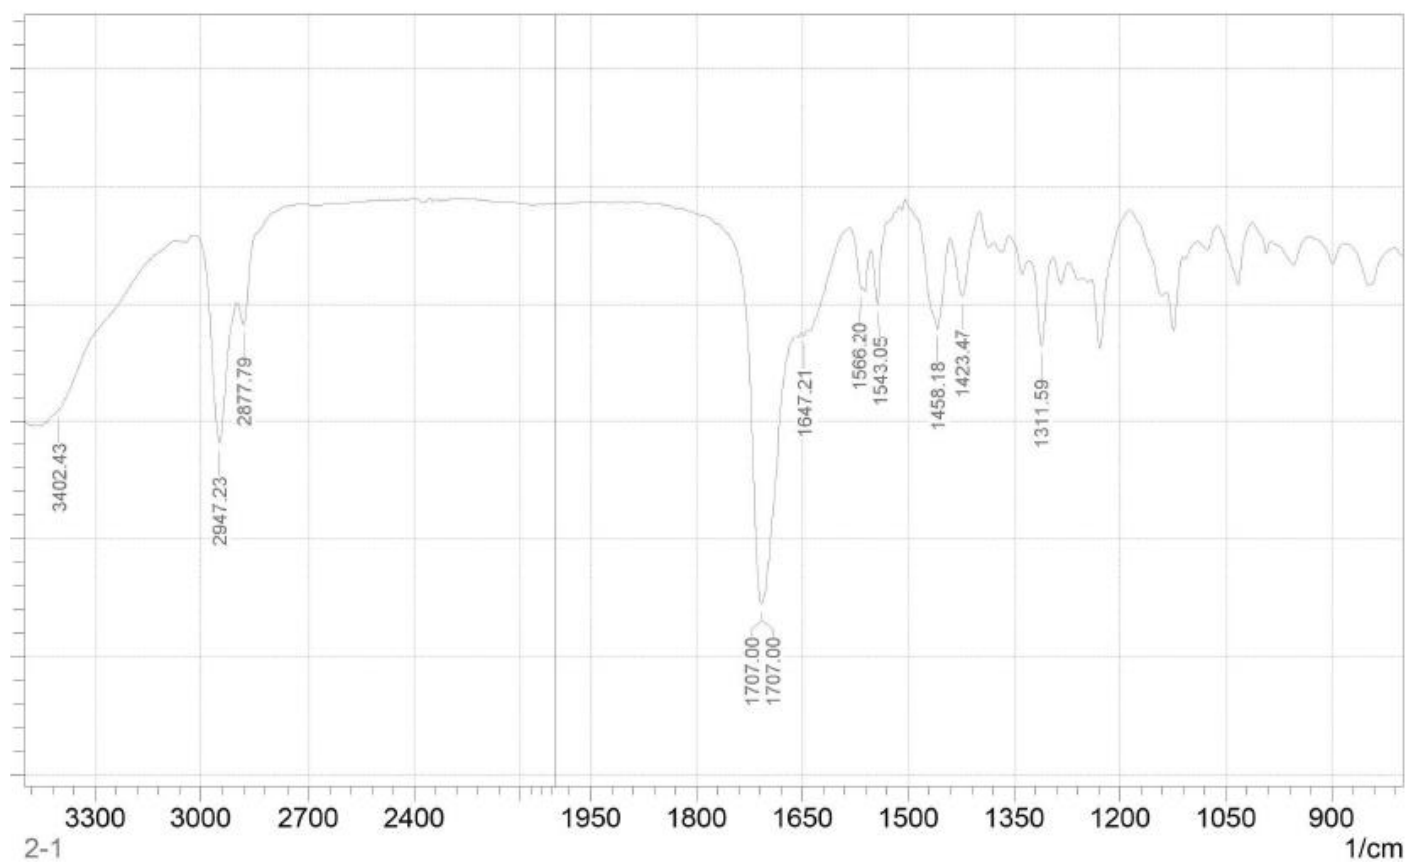

Figure S19. The FTIR spectrum for the polymerization of 2-cyclohexen-1-one.

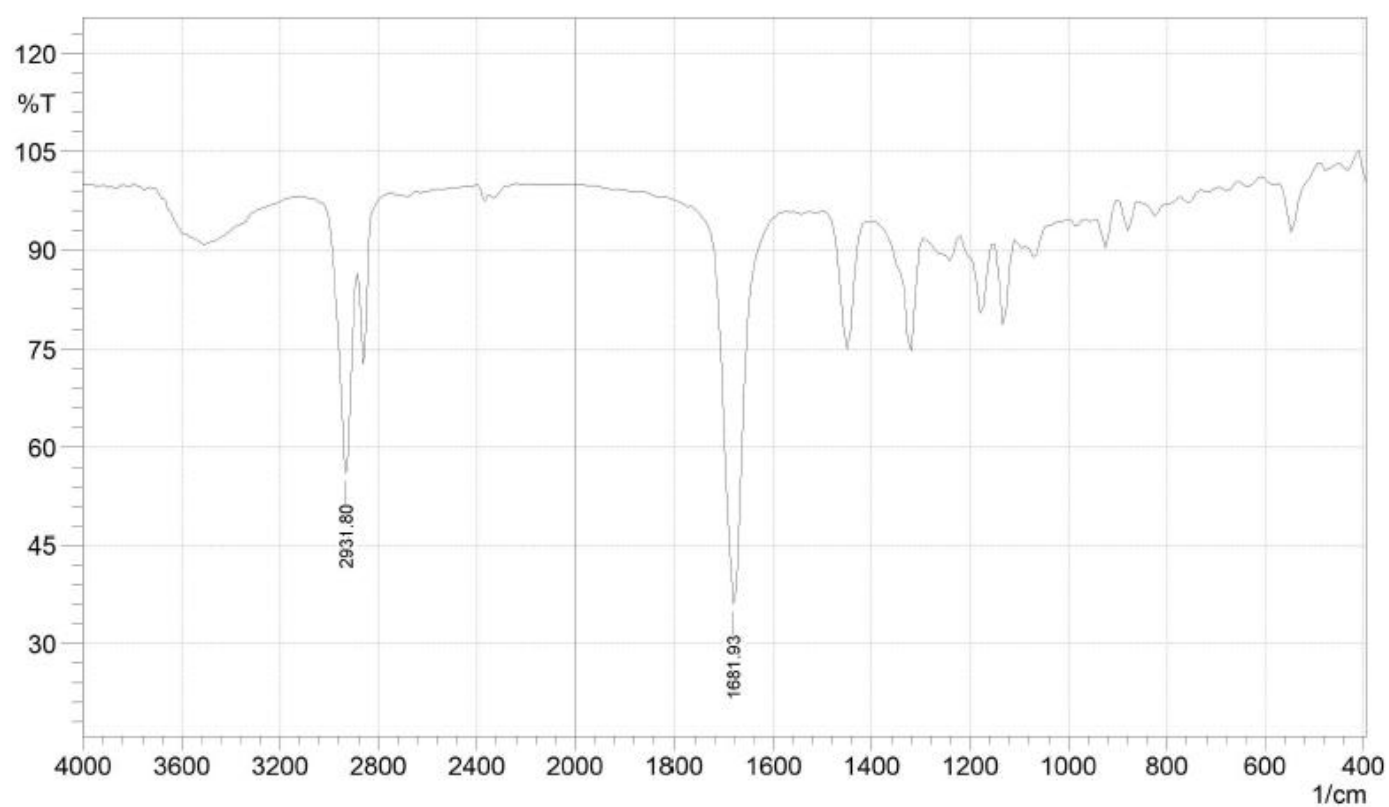

Figure S20. The FTIR spectrum for the polymerization of 2-cyclohepten-1-one.

#### References:

- S1 Z. Liu, J. H. Q. Lee, R. Ganguly, D. Vidović, *Chem. Eur.-J.* 2015, **21**, 11344
- S2 D.-H. Lee, A. Taher, S. Hossain, M-J. Jin, *Org. Lett.* 2011, **13**, 5540.
- S3 A. B. Chaplin, A. S. Weller, *Eur. J. Inorg. Chem.* 2010, **32**, 5124.
- S4 Y. Yang, H. Li, C. Wang, H. W. Roesky, *Inorg. Chem.* 2012, **51**, 2204.
- S5 J. M. Sarria Toro, T. den Hartog and P. Chen, *Chem. Commun.* 2014, **50**, 10608.
- S6 D. C. Bradley, I. S. Harding, A. D. Keefe, M. Motevalli and D. H. Zheng, *J. Chem. Soc., Dalton Trans.*, 1996, 3931.
- S7 *CrysAlisPro v 1.171.39.46*, Rigaku Oxford Diffraction, Yarnton, UK (2018).
- S8 G. M. Sheldrick, *Acta Crystallogr., Sect. C* 2015, **71**, 3.
